# Supplementary material
Source: PubMed Central journal article supplement (PMC3932658)
Supplement: NIHMS533920-supplement-S.pdf [file NIHMS533920-supplement-S.pdf]

## SUPPLEMENTARY MATERIALS

### **Replication datasets from the BCAC**

*Australian Breast Cancer Family Study (ABCFS)* Breast cancer cases with histological confirmation, resident in Melbourne and Sydney, were identified through the state cancer registries.[1] Tumour characteristics and vital status were obtained from the pathology reports and relevant medical records.[2]

*Spanish National Cancer Centre Breast Cancer study (CNIO-BCS)* Cases were consecutive and unselected breast cancer patients recruited at the Hospital Monte Naranco, Oviedo, Spain.[3] Information for tumour characteristics and survival data was obtained from the treating physicians.[3]

*Hannover Breast Cancer Study (HABCS)* Breast cancer patients who received radiotherapy were recruited in the Department of Radiation Oncology of the Medical School Hannover during 1997-2003.[4,5] The histopathology and medical reports were reviewed to obtain the clinical characteristics of the cancer patients, and active follow-up was conducted for vital status.[6]

*National Cancer Institute Breast Cancer Study in Poland (PBCS)* Incident breast cancer patients with either histological or cytological confirmation were recruited through a rapid identification system at collaborating hospitals in the cities of Warsaw and Lodz during the period from 2000 to 2003, and were identified periodically through Cancer registries in both cities.[7] A total of 2126 cancer patients were included in the BCAC dataset. Medical records and surgical pathology reports were

examined to retrieve relevant characteristics for tumours, and vital status was confirmed by active follow-up every 5 years.[6]

*Studies of Epidemiology and Risk Factors in Cancer Heredity (SEARCH)* The

SEARCH study was launched from 1996 to the present, comprising 2 groups of cases.

Incident breast cancer patients were identified from the Anglian Breast Cancer

Registry after 1996 and prevalent patients with diagnosed age <55 from 1991-1996

was also included. A total of 4531 breast cancer patients were included in the BCAC

consortium.[8,5] Vital status for cases was retrieved by passive follow-up through

national death registrations and active follow-up by the cancer registry every 5

years.[6]

*US Radiologic Technologist (USRT) Study* Participants were drawn from a nested

case-control study of breast cancer conducted within the US radiologic technologist

cohort study. Mail surveys for the USRT were conducted between 1983 and 1998, and

biospecimens for the breast cancer study were collected between 1999 and 2004.

Breast cancers were confirmed by requesting medical records from the physicians or

hospitals.[9] There were 861 breast cancer patients in the BCAC consortium, and

tumour characteristics were not collected. Vital status was ascertained by the linkage

of social security mortality files and the National Death Index.[10]

## References

- 1 Dite GS, Jenkins MA, Southey MC, Hocking JS, Giles GG, McCredie MRE, Venter DJ, Hopper JL (2003) Familial risks, early-onset breast cancer, and BRCA1 and BRCA2 germline mutations. *J Natl Cancer Inst* 95 (6):448-457
- 2 Phillips KA, Milne RL, Friedlander ML, Jenkins MA, McCredie MRE, Giles GG, Hopper JL (2004) Prognosis of premenopausal breast cancer and childbirth prior to diagnosis. *J Clin Oncol* 22 (4):699-705. doi:10.1200/jco.2004.07.062
- 3 Azzato EM, Tyrer J, Fasching PA, Beckmann MW, Ekici AB, Schulz-Wendtland R, Bojesen SE, Nordestgaard BG, Flyger H, Milne RL, Arias JI, Menendez P, Benitez J, Chang-Claude J, Hein R, Wang-Gohrke S, Nevanlinna H, Heikkinen T, Aittomaki K, Blomqvist C, Margolin S, Mannermaa A, Kosma VM, Kataja V, Beesley J, Chen XQ, Chenevix-Trench G, Couch FJ, Olson JE, Fredericksen ZS, Wang XS, Giles GG, Severi G, Baglietto L, Southey MC, Devilee P, Tollenaar R, Seynaeve C, Garcia-Closas M, Lissowska J, Sherman ME, Bolton KL, Hall P, Czene K, Cox A, Brock IW, Elliott GC, Reed MWR, Greenberg D, Anton-Culver H, Ziogas A, Humphreys M, Easton DF, Caporaso NE, Pharoah PDP (2010) Association Between a Germline OCA2 Polymorphism at Chromosome 15q13.1 and Estrogen Receptor-Negative Breast Cancer Survival. *J Natl Cancer Inst* 102 (9):650-662. doi:10.1093/jnci/djq057
- 4 Steinmann D, Bremer M, Rades D, Skawran B, Siebrands C, Karstens JH, Dork T (2001) Mutations of the BRCA1 and BRCA2 genes in patients with bilateral breast cancer. *Br J Cancer* 85 (6):850-858
- 5 The Breast Cancer Association Consortium (2006) Commonly studied single-nucleotide polymorphisms and breast cancer: Results from the Breast Cancer Association Consortium. *J Natl Cancer Inst* 98 (19):1382-1396
- 6 Garcia-Closas M, Hall P, Nevanlinna H, Pooley K, Morrison J, Richesson DA, Bojesen SE, Nordestgaard BG, Axelsson CK, Arias JI, Milne RL, Ribas G, Gonzalez-Neira A, Benitez J, Zamora P, Brauch H, Justenhoven C, Hamann U, Ko YD, Bruening T, Haas S, Dork T, Schurmann P, Hillemanns P, Bogdanova N, Bremer M, Karstens JH, Fagerholm R, Aaltonen K, Aittomaki K, Von Smitten K, Blomqvist C, Mannermaa A, Uusitupa M, Eskelinen M, Tengstrom M, Kosma VM, Kataja V, Chenevix-Trench G, Spurdle AB, Beesley J, Chen X, Devilee P, Van Asperen CJ, Jacobi CE, Tollenaar R, Huijts PEA, Klijn JGM, Chang-Claude J, Kropp S, Slanger T, Flesch-Janys D, Mutschelknauss E, Salazar R, Wang-Gohrke S, Couch F, Goode EL, Olson JE, Vachon C, Fredericksen ZS, Giles GG, Baglietto L, Severi G, Hopper JL, English DR, Southey MC, Haiman CA, Henderson BE, Kolonel LN, Le Marchand L, Stram DO, Hunter DJ, Hankinson SE, Cox DG, Tamimi R, Kraft P, Sherman ME, Chanock SJ, Lissowska J, Brinton LA, Peplonska B, Hooning MJ, Meijers-Heijboer H, Collee JM, Van den Ouweland A, Uitterlinden AG, Liu J, Lin LY, Yuqing L, Humphreys K, Czene K, Cox A,

- Balasubramanian SP, Cross SS, Reed MWR, Blows F, Driver K, Dunning A, Tyrer J, Ponder BAJ, Sangrajrang S, Brennan P, McKay J, Odefrey F, Gabrieau V, Sigurdson A, Doody M, Struewing JP, Alexander B, Easton DF, Pharoah PD (2008) Heterogeneity of breast cancer associations with five susceptibility loci by clinical and pathological characteristics. *PLoS Genet* 4 (4):e1000054
- 7 Garcia-Closas M, Egan KM, Newcomb PA, Brinton LA, Titus-Ernstoff L, Chanock S, Welch R, Lissowska J, Peplonska B, Szeszenia-Dabrowska N, Zatonski W, Bardin-Mikolajczak A, Struewing JP (2006) Polymorphisms in DNA double-strand break repair genes and risk of breast cancer: two population-based studies in USA and Poland, and meta-analyses. *Hum Genet* 119 (4):376-388
- 8 Kuschel B, Auranen A, McBride S, Novik KL, Antoniou A, Lipscombe JM, Day NE, Easton DF, Ponder BAJ, Pharoah PDP, Dunning A (2002) Variants in DNA double-strand break repair genes and breast cancer susceptibility. *Hum Mol Genet* 11 (12):1399-1407
- 9 Bhatti P, Struewing JP, Alexander BH, Hauptmann M, Bowen L, Mateus-Pereira LH, Pineda MA, Simon SL, Weinstock RM, Rosenstein M, Stovall M, Preston DL, Linet MS, Doody MM, Sigurdson AJ (2008) Polymorphisms in DNA repair genes, ionizing radiation exposure and risk of breast cancer in US radiologic technologists. *Int J Cancer* 122 (1):177-182. doi:10.1002/ijc.23066
- 10 Sigurdson AJ, Doody MM, Rao RS, Freedman DM, Alexander BH, Hauptmann M, Mohan AK, Yoshinaga S, Hill DA, Tarone R, Mabuchi K, Ron E, Linet MS (2003) Cancer incidence in the US radiologic technologists health study, 1983-1998. *Cancer* 97 (12):3080-3089

## **Supplementary figure legend**

Supplementary Figure 1 Kaplan-Meier survival estimates by rs3218536 in pooled analysis
