# Supplementary material
Source: PubMed Central journal article supplement (PMC3932658)
Supplement: NIHMS533920-supplement-TS1.pdf [file NIHMS533920-supplement-TS1.pdf]

Supplementary Table 1 Summary of time-related variables in SBCS and replication studies

| Variables <sup>*</sup> | Studies <sup>†</sup> | No. case              | Mean         | Median    | Minimum                                  | Maximum |
|------------------------|----------------------|-----------------------|--------------|-----------|------------------------------------------|---------|
| Age at Diagnosis       | ABCFS                | 1395                  | 42.31        | 39        | 23                                       | 69      |
|                        | CNIO-BCS             | 202                   | 59.17        | 59.5      | 35                                       | 84      |
|                        | HABCS                | 821                   | 56.94        | 57        | 27                                       | 91      |
|                        | PBCS                 | 1719                  | 55.32        | 54        | 27                                       | 75      |
|                        | SBCS                 | 814                   | 58.15        | 58        | 28                                       | 92      |
|                        | SEARCH               | 6631                  | 52.86        | 53        | 23                                       | 69      |
|                        | USRT                 | 786                   | 48.27        | 47        | 22                                       | 82      |
| Years to Enter         | ABCFS                | 1395                  | 0.77         | 0.59      | 0                                        | 3.54    |
|                        | CNIO-BCS             | 202                   | 3.64         | 2.9       | 0                                        | 12.59   |
|                        | HABCS                | 821                   | 0.44         | 0.2       | 0.2                                      | 36      |
|                        | PBCS                 | 1719                  | 0.28         | 0.15      | 0                                        | 3.54    |
|                        | SBCS                 | 814                   | 4.05         | 2.85      | 0                                        | 39.99   |
|                        | SEARCH               | 6631                  | 1.75         | 1.4       | 0                                        | 11.75   |
|                        | USRT                 | 786                   | 12.23        | 10        | 2                                        | 45      |
| Years to Status        | ABCFS                | 1395                  | 7.47         | 8.07      | 0.15                                     | 15.46   |
|                        | CNIO-BCS             | 202                   | 6.83         | 6         | 1.08                                     | 16      |
|                        | HABCS                | 821                   | 7.37         | 7.58      | 0.1                                      | 39.5    |
|                        | PBCS                 | 1719                  | 4.78         | 4.95      | 0.09                                     | 9.15    |
|                        | SBCS                 | 814                   | 11.53        | 11.12     | 0.98                                     | 40.59   |
|                        | SEARCH               | 6631                  | 7.94         | 7.27      | 0.48                                     | 18.02   |
|                        | USRT                 | 786                   | 16.57        | 15.26     | 3.15                                     | 45.41   |
| Follow-up              | Studies <sup>†</sup> | No. case <sup>‡</sup> | Time at risk | No. death | Mortality rate<br>(per 100 person-years) |         |
|                        | ABCFS                | 1239                  | 8629.14      | 274       | 3.18                                     |         |
|                        | CNIO-BCS             | 190                   | 574.44       | 6         | 1.04                                     |         |
|                        | HABCS                | 810                   | 5348.04      | 106       | 1.98                                     |         |
|                        | PBCS                 | 1710                  | 7738.44      | 233       | 3.01                                     |         |
|                        | SBCS                 | 747                   | 4237.19      | 146       | 3.45                                     |         |
|                        | SEARCH               | 6628                  | 35942.28     | 928       | 2.58                                     |         |
|                        | USRT                 | 328                   | 904.93       | 4         | 0.44                                     |         |

<sup>\*</sup> Years to enter is the interval between age at diagnosis and recruitment; Years to status is the interval between age at diagnosis and the last follow-up or the death, whichever is sooner

<sup>†</sup> ABCFS: Australian Breast Cancer Family Study; CNIO-BCS: Spanish National Cancer Centre Breast Cancer study; HABCS: Hannover Breast Cancer Study; PBCS: National Cancer Institute Breast Cancer Study in Poland; SBCS: Sheffield Breast Cancer Study; SEARCH: Studies of Epidemiology and Risk Factors in Cancer Heredity; USRT: US Radiologic Technologist Study

<sup>‡</sup> valid numbers included into the left truncation analysis
