# Supplementary material
Source: PubMed Central journal article supplement (PMC3932658)
Supplement: NIHMS533920-supplement-TS2.pdf [file NIHMS533920-supplement-TS2.pdf]

Supplementary Table 2 Tumour characteristics among cases with vital status by study\*

| Variables/Study           | ABCFS |       | CNIO-BCS |       | HABCS |       | PBCS |       | SBCS |       | SEARCH |       | USRT |  |
|---------------------------|-------|-------|----------|-------|-------|-------|------|-------|------|-------|--------|-------|------|--|
|                           | No.   | %     | No.      | %     | No.   | %     | No.  | %     | No.  | %     | No.    | %     | No.  |  |
| <b>Morphology</b>         |       |       |          |       |       |       |      |       |      |       |        |       |      |  |
| Ductal                    |       |       | 149      | 87.65 | 566   | 79.38 | 970  | 60.51 | 528  | 73.85 | 4895   | 74.35 |      |  |
| Lobular                   |       |       | 18       | 10.59 | 77    | 10.80 | 254  | 15.85 | 66   | 9.23  | 938    | 14.24 |      |  |
| Others                    |       |       | 3        | 1.76  | 70    | 9.82  | 379  | 23.64 | 121  | 16.92 | 751    | 11.41 |      |  |
| <b>Grade</b>              |       |       |          |       |       |       |      |       |      |       |        |       |      |  |
| Well differentiated       |       |       | 51       | 32.90 | 49    | 7.44  | 315  | 21.83 | 136  | 20.15 | 1255   | 22.37 |      |  |
| Moderately differentiated |       |       | 64       | 41.29 | 341   | 51.75 | 759  | 52.60 | 308  | 45.63 | 2790   | 49.72 |      |  |
| Poorly-differentiated     |       |       | 40       | 25.81 | 269   | 40.82 | 369  | 25.57 | 231  | 34.22 | 1566   | 27.91 |      |  |
| <b>Stage</b>              |       |       |          |       |       |       |      |       |      |       |        |       |      |  |
| 0                         |       |       | 0        | 0.00  | 11    | 1.50  |      |       |      |       | 25     | 0.38  |      |  |
| 1                         |       |       | 126      | 66.66 | 438   | 59.84 |      |       |      |       | 3276   | 50.44 |      |  |
| 2                         |       |       | 61       | 32.28 | 238   | 32.51 |      |       |      |       | 2877   | 44.29 |      |  |
| 3                         |       |       | 1        | 0.53  | 18    | 2.46  |      |       |      |       | 240    | 3.69  |      |  |
| 4                         |       |       | 1        | 0.53  | 27    | 3.69  |      |       |      |       | 78     | 1.20  |      |  |
| <b>Lymph node status</b>  |       |       |          |       |       |       |      |       |      |       |        |       |      |  |
| Negative                  | 684   | 58.11 | 150      | 79.37 | 465   | 65.13 | 963  | 62.82 | 488  | 71.24 | 3091   | 63.97 |      |  |
| Positive                  | 493   | 41.89 | 39       | 20.63 | 249   | 34.87 | 570  | 37.18 | 197  | 28.76 | 1741   | 36.03 |      |  |
| <b>ER status</b>          |       |       |          |       |       |       |      |       |      |       |        |       |      |  |
| Negative                  | 409   | 34.49 | 35       | 24.65 | 62    | 10.54 | 500  | 33.90 | 110  | 25.70 | 862    | 19.50 |      |  |
| Positive                  | 777   | 65.51 | 107      | 75.35 | 526   | 89.46 | 975  | 66.10 | 318  | 74.30 | 3559   | 80.50 |      |  |
| <b>PR status</b>          |       |       |          |       |       |       |      |       |      |       |        |       |      |  |
| Negative                  | 370   | 31.33 | 58       | 41.13 | 68    | 12.19 | 716  | 48.71 | 101  | 37.97 | 887    | 34.05 |      |  |
| Positive                  | 811   | 68.67 | 83       | 58.87 | 490   | 87.81 | 754  | 51.29 | 165  | 62.03 | 1718   | 65.95 |      |  |

\* total numbers differ due to missing information. Blank cells indicate information was not collected.
