# Supplementary material
Source: PubMed Central journal article supplement (PMC3932658)
Supplement: NIHMS533920-supplement-TS3.pdf [file NIHMS533920-supplement-TS3.pdf]

Supplementary Table 3 Genotyping quality of the XRCC2 SNPs in Sheffield (SBCS) study

| SNPs       | Position <sup>†</sup> | Concordance rate | Call Rate | Common/Rare <sup>‡</sup> | MAF <sup>‡</sup> | HWE <sup>‡,§</sup> |
|------------|-----------------------|------------------|-----------|--------------------------|------------------|--------------------|
| rs3218556* | 151974534             | 100              | 94.7      | C/T                      | 0.04             | 0.7011             |
| rs3218536  | 151976940             | 98.9             | 98.1      | G/A                      | 0.09             | 0.1098             |
| rs3218534* | 151977928             | 99.3             | 95.9      | C/T                      | 0.45             | 1.0000             |
| rs3218501  | 151982850             | 100              | 98.8      | C/G                      | 0.04             | 1.0000             |
| rs3218499  | 151983072             | 98.9             | 98        | G/C                      | 0.23             | 0.1758             |
| rs3218455  | 151991349             | 98.9             | 98        | T/C                      | 0.10             | 0.0001             |
| rs3111465  | 151993408             | 99               | 87.2      | G/A                      | 0.05             | 0.7479             |
| rs3094406  | 151993798             | 99.4             | 82.3      | C/G                      | 0.09             | 0.4271             |
| rs3218408  | 151998549             | 99.2             | 97.9      | T/G                      | 0.23             | 0.2024             |
| rs3218400  | 152000622             | 99.6             | 99        | C/A                      | 0.10             | 0.7415             |
| rs2106776  | 152003857             | 98.9             | 82.8      | C/T                      | 0.45             | 0.7479             |
| rs3218374  | 152005067             | 97.5             | 97.8      | C/G                      | 0.46             | 0.2288             |

\* genotyping was done by TaqMan

<sup>†</sup> NCBI genome build 36.1

<sup>‡</sup> Common/Minor: common and rare allele in controls; MAF: minor allele frequency in controls; HWE: Hardy-Weinberg equilibrium

<sup>§</sup> empirical p values based on 10,000 permutations
