# Supplementary material
Source: PubMed Central journal article supplement (PMC3932658)
Supplement: NIHMS533920-supplement-TS4.pdf [file NIHMS533920-supplement-TS4.pdf]

Supplementary Table 4 Associations of the XRCC2 SNPs with breast cancer risk in Sheffield (SBCS) study

| SNPs      | Heterozygote     | Rare homozygote         | p <sup>†</sup>             | Additive         |                    | Dominant         |        | Recessive               |                            |
|-----------|------------------|-------------------------|----------------------------|------------------|--------------------|------------------|--------|-------------------------|----------------------------|
|           | OR (95% CI)      | OR (95% CI)             |                            | Per-alleleOR     | p <sub>trend</sub> | OR (95% CI)      | p      | OR (95% CI)             | p                          |
| rs3218556 | 0.96 (0.70-1.31) | NA*                     | 0.5030                     | 0.91 (0.67-1.24) | 0.5027             | 0.93 (0.68-1.28) | 0.6703 | NA*                     | 0.9692                     |
| rs3218536 | 0.81 (0.65-1.02) | 1.56 (0.51-4.8)         | 0.1280                     | 0.86 (0.7-1.06)  | 0.1600             | 0.83 (0.67-1.04) | 0.0984 | 1.62 (0.53-4.96)        | 0.3994                     |
| rs3218534 | 0.95 (0.79-1.15) | 0.93 (0.73-1.19)        | 0.8190                     | 0.96 (0.86-1.09) | 0.5468             | 0.95 (0.79-1.13) | 0.5527 | 0.96 (0.78-1.19)        | 0.7077                     |
| rs3218501 | 0.99 (0.72-1.36) | 2.02 (0.18-22.32)       | 0.9270                     | 1.01 (0.74-1.37) | 0.9435             | 1 (0.73-1.37)    | 0.9929 | 2.02 (0.18-22.34)       | 0.5653                     |
| rs3218499 | 1.00 (0.84-1.20) | 1.27 (0.86-1.87)        | 0.4830                     | 1.06 (0.92-1.22) | 0.4479             | 1.03 (0.87-1.22) | 0.7075 | 1.26 (0.86-1.85)        | 0.2283                     |
| rs3218455 | 0.96 (0.76-1.21) | 0.63 (0.34-1.19)        | 0.3530                     | 0.90 (0.74-1.09) | 0.2764             | 0.92 (0.73-1.15) | 0.4489 | 0.64 (0.34-1.2)         | 0.1628                     |
| rs3111465 | 0.89 (0.66-1.20) | 1.02 (0.21-5.08)        | 0.7960                     | 0.90 (0.68-1.2)  | 0.4828             | 0.89 (0.66-1.2)  | 0.4578 | 1.03 (0.21-5.13)        | 0.9675                     |
| rs3094406 | 1.12 (0.88-1.42) | 1.21 (0.52-2.82)        | 0.6070                     | 1.11 (0.9-1.38)  | 0.3242             | 1.12 (0.89-1.42) | 0.3318 | 1.19 (0.51-2.77)        | 0.6876                     |
| rs3218408 | 0.91 (0.76-1.09) | <b>1.86 (1.29-2.67)</b> | <b>6.7×10<sup>-4</sup></b> | 1.12 (0.97-1.28) | 0.1183             | 1.01 (0.86-1.20) | 0.8880 | <b>1.92 (1.35-2.75)</b> | <b>2.3×10<sup>-4</sup></b> |
| rs3218400 | 1.18 (0.95-1.45) | 1.35 (0.59-3.10)        | 0.2460                     | 1.17 (0.97-1.42) | 0.0972             | 1.18 (0.97-1.45) | 0.1037 | 1.31 (0.57-3)           | 0.5246                     |
| rs2106776 | 1.00 (0.81-1.23) | 0.98 (0.76-1.28)        | 0.9920                     | 0.99 (0.87-1.13) | 0.9012             | 0.99 (0.81-1.21) | 0.9349 | 0.99 (0.79-1.23)        | 0.9018                     |
| rs3218374 | 1.01 (0.83-1.22) | 0.95 (0.75-1.2)         | 0.8510                     | 0.98 (0.87-1.1)  | 0.6899             | 0.99 (0.83-1.19) | 0.9096 | 0.94 (0.77-1.15)        | 0.5712                     |

\* NA: not applicable because that the number of case/control is 0 for this genotype.

† independence test with 2 df.
