# Supplementary material
Source: PubMed Central journal article supplement (PMC3932658)
Supplement: NIHMS533920-supplement-TS5.pdf [file NIHMS533920-supplement-TS5.pdf]

Supplementary Table 5 Hazards ratios of rs3218536 by study and ER and PR status\*

| PR status     | Negative |          |                   | Positive                 |          |                  |
|---------------|----------|----------|-------------------|--------------------------|----------|------------------|
|               | Study    | No.Total | No.deaths         | HR <sup>†</sup> (95% CI) | No.Total | No.deaths        |
| ABCFS         | 327      | 88       | 1.22 (0.72-2.07)  | 752                      | 148      | 1.11 (0.69-1.77) |
| CNIO-BCS      | 57       | 5        | 1.09 (0.13-9.06)  | 82                       | 0        | NA               |
| HABCS         | 35       | 4        | 2.18 (0.42-11.22) | 372                      | 49       | 0.58 (0.18-1.87) |
| PBCS          | 626      | 134      | 1.58 (1.00-2.49)  | 668                      | 55       | 0.95 (0.43-2.13) |
| SBCS          | 93       | 29       | 1.36 (0.71-2.61)  | 152                      | 29       | 1.82 (0.81-4.09) |
| SEARCH        | 728      | 182      | 1.18 (0.84-1.65)  | 1465                     | 202      | 1.00 (0.70-1.46) |
| <b>Pooled</b> | 1866     | 442      | 1.31 (1.04-1.63)  | 3491                     | 483      | 1.06 (0.82-1.36) |

  

| ER status     | Negative |          |                   | Positive                 |          |                   |
|---------------|----------|----------|-------------------|--------------------------|----------|-------------------|
|               | Study    | No.Total | No.deaths         | HR <sup>†</sup> (95% CI) | No.Total | No.deaths         |
| ABCFS         | 367      | 104      | 1.02 (0.59-1.76)  | 714                      | 132      | 1.28 (0.81-2.02)  |
| CNIO-BCS      | 35       | 2        | NA                | 105                      | 3        | 2.12 (0.28-15.82) |
| HABCS         | 33       | 5        | 2.29 (0.51-10.38) | 395                      | 52       | 0.50 (0.16-1.61)  |
| PBCS          | 434      | 99       | 1.35 (0.81-2.26)  | 866                      | 91       | 1.11 (0.60-2.07)  |
| SBCS          | 102      | 28       | 0.68 (0.21-2.22)  | 299                      | 66       | 1.97 (1.19-3.25)  |
| SEARCH        | 624      | 158      | 1.16 (0.79-1.70)  | 2368                     | 337      | 1.26 (0.98-1.63)  |
| <b>Pooled</b> | 1595     | 396      | 1.14 (0.88-1.47)  | 4747                     | 681      | 1.29 (1.07-1.56)  |

\* PR: progesterone receptor; ER: estrogen receptor; NA: not available; total numbers differ because of missing PR and ER status

† adjusted for age and accounting for left-censoring time; pooled results adjusted for study
