# Supplementary material
Source: PubMed Central journal article supplement (PMC3932658)

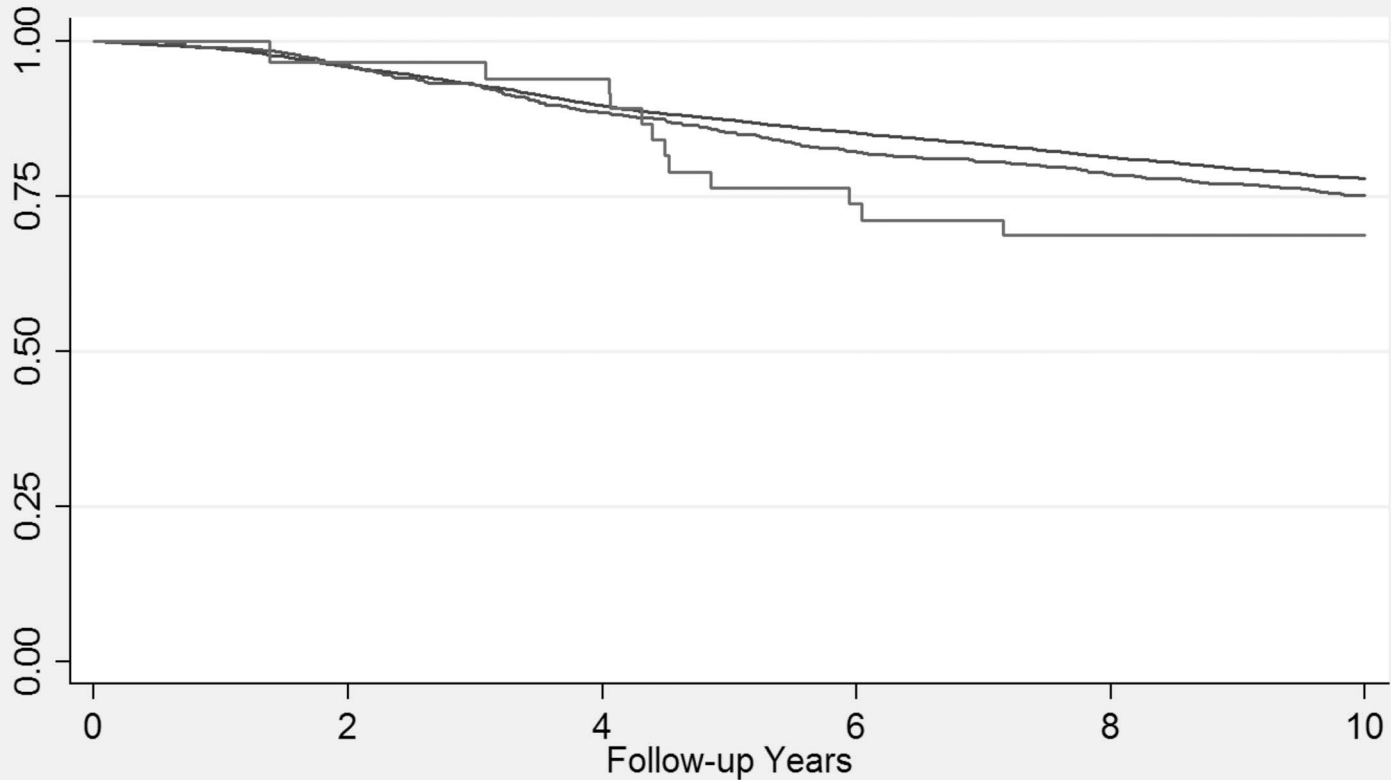

0: GG 1:GA 2:AA

rs3218536\_code = 0

rs3218536\_code = 1

rs3218536\_code = 2

Supplement: NIHMS533920-supplement-SF1.pdf [file NIHMS533920-supplement-SF1.pdf]
